# Supplementary material for: Altered RNome expression in Murine Gastrocnemius Muscle Following Exposure to Jararhagin, a Metalloproteinase from Bothrops Jararaca Venom
Source: Preprints.org preprint supplement (doi:10.20944/preprints202206.0057.v1), 2022-06-06
Supplement: Supplementary file 1 [file supplementary]

## Sheet: Table S1
Table S1. known sRNAs differentially expressed in all groups
Gene ID	FC ([Jar 24hrs] vs [Jar 2hrs])	Regulation ([Jar 24hrs] vs [Jar 2hrs])	FC ([Jar 24hrs] vs [PBS 24hrs])	Regulation ([Jar 24hrs] vs [PBS 24hrs])	FC ([Jar 2hrs] vs [PBS 2hrs])	Regulation ([Jar 2hrs] vs [PBS 2hrs])	Accession	Entrez ID	Gene Type	DB Refs
ENSMUSG00000093178	24616036	up	13643926	up	-15672783	down	Snord87		snoRNA	RFAM:RF00439
MI0000144	26201239	up	10711957	up	-11062785	down	mmu-mir-30a	387225	miRNA	miRBase:MI0000144
MI0000548	14602865	up	26844625	up	-16519582	down	mmu-mir-30c-2	723964	miRNA	miRBase:MI0000548
chr1.trna1555	48350835	up	34224353	up	20247145	up	trna1555		tRNA
ENSMUSG00000065629	-11407659	down	-28621275	down	-1285549	down	U3		snoRNA	RFAM:RF00012
ENSMUSG00000077704	23327725	up	14749993	up	-12472678	down	Snord89		snoRNA	RFAM:RF00578
ENSMUSG00000089093	2900722	up	18295093	up	-11633242	down	Snord11		snoRNA	RFAM:RF01192
ENSMUSG00000064602	16842512	up	20509384	up	10795313	up	Snora41		snoRNA	RFAM:RF00403
ENSMUSG00000094655	27455938	up	3118753	up	12453026	up	U2		snRNA	RFAM:RF00004
ENSMUSG00000094050	29281573	up	31388474	up	-11853739	down	U2		snRNA	RFAM:RF00004
ENSMUSG00000093956	29281573	up	31388474	up	-11853739	down	U2		snRNA	RFAM:RF00004
ENSMUSG00000093843	29212117	up	3095404	up	-11844922	down	U2		snRNA	RFAM:RF00004
chr1.trna1400	14572419	up	2947998	up	15495282	up	trna1400		tRNA
MI0026036	35812013	up	65797806	up	11963034	up	mmu-mir-3535		miRNA	miRBase:MI0026036
ENSMUSG00000064696	35812013	up	65797806	up	11963034	up	SNORD20		snoRNA	RFAM:RF00217
ENSMUSG00000064823	10697635	up	20682652	up	1177403	up	Snord82		snoRNA	RFAM:RF00158
ENSMUSG00000087968	-12990816	down	32015305	up	13243343	up	SCARNA6		snoRNA	RFAM:RF00478
ENSMUSG00000089281	19822474	up	29115055	up	10088131	up	Scarna6		snoRNA	RFAM:RF00478
ENSMUSG00000080542	15834656	up	20645418	up	-1109741	down	U4atac		snRNA	RFAM:RF00618
ENSMUSG00000093146	11466322	up	3258508	up	-13370916	down	SCARNA15		snoRNA	RFAM:RF00426
chr1.trna485	29523077	up	26071572	up	2040019	up	trna485		tRNA
chr1.trna1192	18476788	up	31050394	up	11579019	up	trna1192		tRNA
ENSMUSG00000064440	18571669	up	42782645	up	14544911	up	SNORD74		snoRNA	RFAM:RF00284
ENSMUSG00000080463	6600138	up	35680983	up	10160309	up	SNORD75		snoRNA	RFAM:RF00612
ENSMUSG00000084667	34149451	up	56888123	up	-11810178	down	SNORD44		snoRNA	RFAM:RF00287
ENSMUSG00000065160	3907882	up	39555264	up	-17430745	down	SNORD79		snoRNA	RFAM:RF00152
ENSMUSG00000064968	192446	up	35470316	up	-15140533	down	Snord47		snoRNA	RFAM:RF00281
ENSMUSG00000065905	34416716	up	-1097163	down	18063328	up	U1		snRNA	RFAM:RF00003
chr1.trna1014	-11833483	down	-21024227	down	-12460356	down	trna1014		tRNA
chr1.trna699	1465334	up	-1164748	down	24556484	up	trna699		tRNA
chr1.trna1010	1271296	up	12487092	up	21378534	up	trna1010		tRNA
chr1.trna701	2043728	up	2053893	up	-1074349	down	trna701		tRNA
chr1.trna702	3520143	up	10707692	up	11275276	up	trna702		tRNA
chr1.trna1007	1271296	up	12487092	up	21378534	up	trna1007		tRNA
chr1.trna703	2043728	up	2053893	up	-1074349	down	trna703		tRNA
chr1.trna704	3520143	up	10707692	up	11275276	up	trna704		tRNA
chr1.trna1004	1271296	up	12487092	up	21378534	up	trna1004		tRNA
chr1.trna705	2043728	up	2053893	up	-1074349	down	trna705		tRNA
chr1.trna706	3520143	up	10707692	up	11275276	up	trna706		tRNA
chr1.trna1001	16536906	up	26052897	up	-10347396	down	trna1001		tRNA
chr1.trna710	-18294247	down	-4345161	down	-10480155	down	trna710		tRNA
ENSMUSG00000094668	11494498	up	2248549	up	17258173	up	U5		snRNA	RFAM:RF00020
MI0000153	2521245	up	16119881	up	-17400099	down	mmu-mir-126a	387145	miRNA	miRBase:MI0000153
ENSMUSG00000077192	22763777	up	21224275	up	-11849539	down	Snora17		snoRNA	RFAM:RF00560
ENSMUSG00000065295	2912574	up	22193604	up	-13540134	down	SNORD36		snoRNA	RFAM:RF00049
ENSMUSG00000065124	16733043	up	-22005632	down	-15676844	down	Snora65		snoRNA	RFAM:RF00302
ENSMUSG00000077756	27936943	up	1224511	up	11440109	up	Snord90		snoRNA	RFAM:RF00579
MI0000223	2404704	up	2056006	up	11650624	up	mmu-mir-181a-2	387176	miRNA	miRBase:MI0000223
chr2.trna263	2058987	up	2541307	up	-11545084	down	trna263		tRNA
chr2.trna1747	14058125	up	-1333376	down	23880289	up	trna1747		tRNA
MI0000221	22503614	up	-14076695	down	-13763983	down	mmu-mir-10b	387144	miRNA	miRBase:MI0000221|RFAM:RF00104
chr2.trna511	24845424	up	10652822	up	-13632226	down	trna511		tRNA
ENSMUSG00000065794	5010705	up	28028355	up	10987898	up	U1		snRNA	RFAM:RF00003
chr2.trna1509	12553289	up	24531353	up	-10959898	down	trna1509		tRNA
chr2.trna1431	-11396824	down	-2091821	down	-11268479	down	trna1431		tRNA
ENSMUSG00000080610	-2473492	down	-12130929	down	14183218	up	Snord110		snoRNA	RFAM:RF00610
ENSMUSG00000065289	11868038	up	25324142	up	-13902708	down	SNORD56		snoRNA	RFAM:RF00275
ENSMUSG00000065272	20382128	up	36174555	up	15344698	up	Snord57		snoRNA	RFAM:RF00274
ENSMUSG00000077698	13658046	up	24303896	up	-12436094	down	Snord12		snoRNA	RFAM:RF00581
chr3.trna28	20990632	up	10548556	up	-19613605	down	trna28		tRNA
ENSMUSG00000084517	24436367	up	12959375	up	-13922933	down	SNORA66		snoRNA	RFAM:RF00155
chr3.trna878	14672002	up	-1247276	down	23759944	up	trna878		tRNA
ENSMUSG00000064390	26497414	up	1152174	up	-13263369	down	Rnu73b		snoRNA	RFAM:RF00071
ENSMUSG00000088604	1191979	up	37302139	up	-12682842	down	SCARNA15		snoRNA	RFAM:RF00426
ENSMUSG00000095701	302125	up	1808796	up	10006565	up	U1		snRNA	RFAM:RF00003
chr3.trna284	-20045378	down	-4721677	down	-10261992	down	trna284		tRNA
chr3.trna752	35321457	up	-12287378	down	-11907308	down	trna752		tRNA
chr3.trna292	45091352	up	28814878	up	14835602	up	trna292		tRNA
chr3.trna293	26944947	up	-15442693	down	-19323536	down	trna293		tRNA
ENSMUSG00000096838	302125	up	1808796	up	10006565	up	U1		snRNA	RFAM:RF00003
ENSMUSG00000065773	47246914	up	20887537	up	-10135818	down	U1		snRNA	RFAM:RF00003
chr3.trna749	4983837	up	13818498	up	-10424842	down	trna749		tRNA
chr3.trna748	3373944	up	3001528	up	19342804	up	trna748		tRNA
chr3.trna745	2213762	up	25221062	up	-10319507	down	trna745		tRNA
ENSMUSG00000065669	12114486	up	23635828	up	-10393087	down	SNORA5		snoRNA	RFAM:RF00392
chr3.trna628	2209749	up	11200147	up	1462514	up	trna628		tRNA
chr3.trna622	-11051587	down	-20543816	down	-12893653	down	trna622		tRNA
ENSMUSG00000064731	-14970701	down	-21134586	down	-22788	down	Snord45b		snoRNA	RFAM:RF00279
ENSMUSG00000065738	28346105	up	24655552	up	-13324375	down	SNORD45		snoRNA	RFAM:RF00279
chr4.trna67	76841893	up	-1153166	down	-2384478	down	trna67		tRNA
ENSMUSG00000065344	59818854	up	28186343	up	-13975934	down	U1		snRNA	RFAM:RF00003
MI0000148	21440096	up	11638951	up	-12261869	down	mmu-mir-101a	387143	miRNA	miRBase:MI0000148
ENSMUSG00000064751	37712588	up	-10570042	down	14676062	up	SNORD46		snoRNA	RFAM:RF00218
ENSMUSG00000092680	-257983	down	-17025466	down	17168326	up	Snord55		snoRNA	RFAM:RF00157
ENSMUSG00000093793	-22875724	down	1222053	up	16156703	up	SNORD103		snoRNA	RFAM:RF00188
ENSMUSG00000095119	-22875724	down	1222053	up	16156703	up	SNORD103		snoRNA	RFAM:RF00188
chr4.trna622	2015301	up	13694438	up	-13025864	down	trna622		tRNA
ENSMUSG00000077323	2609305	up	19587226	up	-12051827	down	U11		snRNA	RFAM:RF00548
ENSMUSG00000080615	-11954107	down	28022513	up	16054896	up	Snord99		snoRNA	RFAM:RF00608
ENSMUSG00000064387	20216641	up	44571757	up	15795269	up	Snora73a		snoRNA	RFAM:RF00045
chr4.trna1308	21269984	up	12895824	up	13625275	up	trna1308		tRNA
ENSMUSG00000088131	1169649	up	33560266	up	-13242986	down	SCARNA15		snoRNA	RFAM:RF00426
ENSMUSG00000064851	25406158	up	26554587	up	-15220119	down	U12		snRNA	RFAM:RF00007
ENSMUSG00000093355	-20656497	down	-11397561	down	14057475	up	Snora26		snoRNA	RFAM:RF00568
MI0009958	22073722	up	15586429	up	-10075469	down	mmu-mir-1961	100316841	miRNA	miRBase:MI0009958
ENSMUSG00000064453	13529102	up	2026857	up	-15564103	down	Snord21		snoRNA	RFAM:RF00068
ENSMUSG00000077426	-10848987	down	-23612347	down	-11308655	down	SNORA66		snoRNA	RFAM:RF00155
MI0021587	-7433707	down	-27122438	down	1978209	up	mmu-mir-6240		miRNA	miRBase:MI0021587
ENSMUSG00000096243	2033628	up	26995711	up	13596526	up	U4		snRNA	RFAM:RF00015
ENSMUSG00000094377	21262193	up	27472508	up	1444695	up	U4		snRNA	RFAM:RF00015
chr5.trna1318	25743718	up	15751321	up	19113708	up	trna1318		tRNA
chr5.trna703	22941837	up	15454974	up	15196453	up	trna703		tRNA
ENSMUSG00000077185	15577633	up	29386103	up	13768685	up	SNORD102		snoRNA	RFAM:RF00187
ENSMUSG00000065770	4112938	up	12783183	up	16654476	up	U1		snRNA	RFAM:RF00003
chr6.trna107	12645841	up	-10054462	down	27777991	up	trna107		tRNA
ENSMUSG00000064792	10976626	up	23537064	up	-11354142	down	SNORA32		snoRNA	RFAM:RF00421
ENSMUSG00000080465	24426649	up	17184812	up	11122469	up	SNORD94		snoRNA	RFAM:RF00613
chr6.trna317	22285671	up	-10053483	down	2278171	up	trna317		tRNA
ENSMUSG00000064563	18206227	up	22527833	up	-14736583	down	Snora7a		snoRNA	RFAM:RF00409
ENSMUSG00000089083	13956583	up	2384698	up	-11475888	down	U7		snRNA	RFAM:RF00066
ENSMUSG00000088208	20400183	up	28242705	up	-14372572	down	SCARNA11		snoRNA	RFAM:RF00564
chr7.trna88	26508455	up	2419265	up	18602145	up	trna88		tRNA
chr7.trna1280	20405085	up	15852913	up	10553827	up	trna1280		tRNA
chr7.trna1217	22375157	up	13802778	up	17666416	up	trna1217		tRNA
ENSMUSG00000080683	1412452	up	1006558	up	-20491998	down	SNORD88		snoRNA	RFAM:RF00604
chr7.trna339	4313752	up	2634848	up	2350589	up	trna339		tRNA
chr7.trna979	-19810636	down	-22328196	down	10502603	up	trna979		tRNA
ENSMUSG00000065822	28156385	up	-12067912	down	-16831267	down	Snord15a		snoRNA	RFAM:RF00067
ENSMUSG00000064600	28608243	up	15238162	up	-11348382	down	SNORA13		snoRNA	RFAM:RF00396
chr7.trna863	23981688	up	3583473	up	19260259	up	trna863		tRNA
ENSMUSG00000064666	16983876	up	-1929189	down	-2125042	down	Snora52		snoRNA	RFAM:RF00419
ENSMUSG00000088252	-13471276	down	-23248868	down	-13887749	down	Snord13		snoRNA	RFAM:RF01210
ENSMUSG00000077563	2658291	up	18474144	up	114297	up	Snora68		snoRNA	RFAM:RF00263
ENSMUSG00000077527	11669196	up	38496647	up	16092654	up	SNORD41		snoRNA	RFAM:RF00588
chr8.trna1013	16982576	up	24089737	up	-10745796	down	trna1013		tRNA
ENSMUSG00000065089	26090798	up	15969573	up	-19442959	down	SNORA46		snoRNA	RFAM:RF00404
ENSMUSG00000077549	11982228	up	26205955	up	-19966346	down	Snord71		snoRNA	RFAM:RF00576
ENSMUSG00000080396	24723127	up	2438989	up	-16381819	down	Snord111		snoRNA	RFAM:RF00611
ENSMUSG00000080518	2273149	up	4555525	up	-19477124	down	SNORD111		snoRNA	RFAM:RF00611
ENSMUSG00000065100	16605381	up	22121997	up	-10758803	down	SNORA57		snoRNA	RFAM:RF00191
ENSMUSG00000064450	11429062	up	12805102	up	-40123568	down	Snord68		snoRNA	RFAM:RF00324
ENSMUSG00000065637	17006764	up	21022909	up	14450701	up	SNORA14		snoRNA	RFAM:RF00397
ENSMUSG00000065282	29079556	up	12846128	up	12843	up	SNORA18		snoRNA	RFAM:RF00425
ENSMUSG00000065226	-13199536	down	-23818755	down	-15949467	down	SNORA8		snoRNA	RFAM:RF00393
ENSMUSG00000064634	23477871	up	14454979	up	-13581524	down	SNORA1		snoRNA	RFAM:RF00408
ENSMUSG00000077506	20074353	up	2555803	up	12833123	up	Scarna9		snoRNA	RFAM:RF00493
ENSMUSG00000089571	26713207	up	50520477	up	20601838	up	snoU105B		snoRNA	RFAM:RF01173
MI0000241	21182752	up	19871927	up	-12422371	down	mmu-mir-199a-1	387194	miRNA	miRBase:MI0000241
ENSMUSG00000065752	2084176	up	21190214	up	10012662	up	SNORD18		snoRNA	RFAM:RF00093
ENSMUSG00000094411	283953	up	12000195	up	10867254	up	SNORD16		snoRNA	RFAM:RF00138
ENSMUSG00000064918	27010496	up	3846789	up	-11592872	down	SNORD18		snoRNA	RFAM:RF00093
ENSMUSG00000095868	27703168	up	18447384	up	10488563	up	SNORD16		snoRNA	RFAM:RF00138
ENSMUSG00000064514	55455346	up	21982355	up	-16459558	down	SNORD18		snoRNA	RFAM:RF00093
ENSMUSG00000088254	40497403	up	39044049	up	-10644124	down	SCARNA14		snoRNA	RFAM:RF00582
chr9.trna1035	2008257	up	1107097	up	-11371295	down	trna1035		tRNA
chr9.trna961	42709374	up	26298273	up	23604128	up	trna961		tRNA
MI0000137	-12959691	down	-20477395	down	-11234516	down	mmu-let-7g	387249	miRNA	miRBase:MI0000137|RFAM:RF00027
ENSMUSG00000064380	25920966	up	44219317	up	-10263695	down	SNORA73		snoRNA	RFAM:RF00045
ENSMUSG00000064925	-20037675	down	-1349964	down	11813083	up	Snora62		snoRNA	RFAM:RF00091
ENSMUSG00000065371	20386026	up	-11471851	down	-11545084	down	U1		snRNA	RFAM:RF00003
ENSMUSG00000070063	24070036	up	13000393	up	-15741022	down	Snora33		snoRNA	RFAM:RF00438
ENSMUSG00000080486	1418741	up	2208217	up	-11758894	down	Snord100		snoRNA	RFAM:RF00609
chr10.trna90	14066045	up	125803	up	20462143	up	trna90		tRNA
ENSMUSG00000065870	10776507	up	14577411	up	23190475	up	U3		snoRNA	RFAM:RF00012
ENSMUSG00000064441	-20620553	down	12345579	up	-11016839	down	Snord37		snoRNA	RFAM:RF00440
ENSMUSG00000077167	18800563	up	20704598	up	12911997	up	SNORA53		snoRNA	RFAM:RF00563
chr10.trna866	14353592	up	-13084347	down	20526168	up	trna866		tRNA
ENSMUSG00000064432	33291044	up	24241083	up	10165039	up	U1		snRNA	RFAM:RF00003
MI0004634	19620928	up	22475479	up	-10694859	down	mmu-mir-677	751518	miRNA	miRBase:MI0004634
ENSMUSG00000093245	19620928	up	22475479	up	-10694859	down	SNORD59		snoRNA	RFAM:RF00273
chr11.trna204	-18353361	down	-4340454	down	-10301795	down	trna204		tRNA
chr11.trna2023	38522587	up	2980837	up	17678549	up	trna2023		tRNA
chr11.trna2022	2243305	up	1604952	up	18541133	up	trna2022		tRNA
chr11.trna2021	2083101	up	17707552	up	-12247865	down	trna2021		tRNA
chr11.trna1912	30841944	up	19386894	up	-16913036	down	trna1912		tRNA
ENSMUSG00000064437	5023947	up	3710212	up	-19000338	down	Snord49b		snoRNA	RFAM:RF00277
ENSMUSG00000065734	12653766	up	3822409	up	18951528	up	Snord49a		snoRNA	RFAM:RF00277
ENSMUSG00000077457	28157504	up	537118	up	-12505969	down	Snord65		snoRNA	RFAM:RF00571
chr11.trna395	22566938	up	1388888	up	17465761	up	trna395		tRNA
chr11.trna1822	22375157	up	13878064	up	17666416	up	trna1822		tRNA
chr11.trna399	22566938	up	13813535	up	17465761	up	trna399		tRNA
chr11.trna1819	14379903	up	-12928134	down	22874613	up	trna1819		tRNA
chr11.trna1818	22507064	up	10466911	up	-11625901	down	trna1818		tRNA
chr11.trna401	2316506	up	1899815	up	-12983384	down	trna401		tRNA
chr11.trna1816	30353966	up	2657169	up	2203826	up	trna1816		tRNA
ENSMUSG00000077637	-10755459	down	-10375913	down	-30352755	down	SNORD91		snoRNA	RFAM:RF00580
MI0001730	-13847778	down	34228199	up	26438313	up	mmu-mir-451a	723870	miRNA	miRBase:MI0001730
ENSMUSG00000064540	11603173	up	22402368	up	-17984303	down	Snord42a		snoRNA	RFAM:RF00150
ENSMUSG00000077625	21629136	up	1629735	up	11015658	up	Snord4a		snoRNA	RFAM:RF00266
ENSMUSG00000065676	20150452	up	38615005	up	1149079	up	Snord42b		snoRNA	RFAM:RF00150
ENSMUSG00000064856	29281573	up	31388474	up	-11853739	down	U2		snRNA	RFAM:RF00004
ENSMUSG00000065715	-10081463	down	2078534	up	13235903	up	Snord7		snoRNA	RFAM:RF00288
MI0000569	44868746	up	40877852	up	15864052	up	mmu-mir-21a	387140	miRNA	miRBase:MI0000569
ENSMUSG00000095969	-2118393	down	-14595054	down	18404248	up	U1		snRNA	RFAM:RF00003
ENSMUSG00000094705	15562651	up	1136415	up	24585035	up	U3		snoRNA	RFAM:RF00012
ENSMUSG00000093842	15562651	up	1136415	up	24585035	up	U3		snoRNA	RFAM:RF00012
ENSMUSG00000094480	15562651	up	11543995	up	24585035	up	U3		snoRNA	RFAM:RF00012
ENSMUSG00000096428	15562651	up	11543995	up	24585035	up	U3		snoRNA	RFAM:RF00012
ENSMUSG00000064512	39962828	up	1470099	up	10451878	up	U1		snRNA	RFAM:RF00003
ENSMUSG00000064807	-12201507	down	-3620959	down	-1488252	down	U3		snoRNA	RFAM:RF00012
MI0000685	-11787366	down	-21790974	down	14618007	up	mmu-mir-10a	723893	miRNA	miRBase:MI0000685|RFAM:RF00104
chr11.trna1446	-11833483	down	-21024227	down	-12460356	down	trna1446		tRNA
chr11.trna1444	23074505	up	29303768	up	1149551	up	trna1444		tRNA
ENSMUSG00000064901	27400296	up	42611265	up	-28303354	down	Snora21		snoRNA	RFAM:RF00412
chr11.trna1432	49721603	up	56811957	up	13500195	up	trna1432		tRNA
ENSMUSG00000065820	-10216419	down	4077561	up	13269823	up	U2		snRNA	RFAM:RF00004
ENSMUSG00000065767	10041416	up	41220884	up	13035575	up	U2		snRNA	RFAM:RF00004
ENSMUSG00000064702	10041416	up	41220884	up	13035575	up	U2		snRNA	RFAM:RF00004
ENSMUSG00000065944	10041416	up	41220884	up	13035575	up	U2		snRNA	RFAM:RF00004
ENSMUSG00000080540	2476787	up	14345337	up	-11129162	down	SNORA50		snoRNA	RFAM:RF00407
MI0014026	23200817	up	23639596	up	-13305138	down	mmu-mir-3064	100526469	miRNA	miRBase:MI0014026
chr11.trna1022	14068629	up	12420667	up	22766848	up	trna1022		tRNA
chr11.trna1234	13692592	up	12627611	up	2272893	up	trna1234		tRNA
ENSMUSG00000088529	22446096	up	20842388	up	11843826	up	SCARNA16		snoRNA	RFAM:RF00424
ENSMUSG00000064427	19893051	up	2644774	up	-11489062	down	SNORA42		snoRNA	RFAM:RF00406
ENSMUSG00000065200	21551409	up	-18324383	down	-17903595	down	SNORA65		snoRNA	RFAM:RF00302
chr12.trna892	27305737	up	210343	up	-13215197	down	trna892		tRNA
ENSMUSG00000096214	-24349918	down	-17014133	down	19136477	up	U1		snRNA	RFAM:RF00003
ENSMUSG00000096206	-26190882	down	-12142297	down	2496604	up	U1		snRNA	RFAM:RF00003
ENSMUSG00000087790	23708196	up	-16862599	down	10993704	up	SNORD127		snoRNA	RFAM:RF01186
ENSMUSG00000064776	14484404	up	-10559883	down	2059885	up	U3		snoRNA	RFAM:RF00012
MI0001526	23321483	up	55551467	up	-13708234	down	mmu-mir-434	723867	miRNA	miRBase:MI0001526
ENSMUSG00000065022	50065994	up	54046574	up	-23383913	down	AF357341		snoRNA	RFAM:RF00181
ENSMUSG00000064493	21142821	up	27613053	up	-18131108	down	Snora28		snoRNA	RFAM:RF00400
chr13.trna1012	3089892	up	26791468	up	21733873	up	trna1012		tRNA
chr13.trna66	2805932	up	28416326	up	20880027	up	trna66		tRNA
chr13.trna67	2805932	up	28416326	up	20880027	up	trna67		tRNA
chr13.trna68	20606441	up	17826473	up	13848388	up	trna68		tRNA
chr13.trna69	21682713	up	11471226	up	10358281	up	trna69		tRNA
chr13.trna70	23175561	up	15670706	up	17913586	up	trna70		tRNA
chr13.trna71	26454318	up	1433342	up	14434533	up	trna71		tRNA
chr13.trna72	218721	up	13137014	up	1299	up	trna72		tRNA
chr13.trna1006	2017135	up	-10297278	down	-15276003	down	trna1006		tRNA
chr13.trna1004	14904639	up	2980613	up	-13020015	down	trna1004		tRNA
chr13.trna77	20055425	up	12768373	up	19385071	up	trna77		tRNA
chr13.trna81	25377872	up	13131429	up	10260851	up	trna81		tRNA
chr13.trna83	27848012	up	13807589	up	-12422917	down	trna83		tRNA
chr13.trna996	30119128	up	12200081	up	-15408392	down	trna996		tRNA
chr13.trna995	2264812	up	29200523	up	12109247	up	trna995		tRNA
chr13.trna992	3058244	up	1238775	up	-15408392	down	trna992		tRNA
chr13.trna990	-1.0	down	-2080277	down	-14249532	down	trna990		tRNA
chr13.trna986	3098464	up	18875346	up	12446644	up	trna986		tRNA
chr13.trna91	-18926903	down	-44913054	down	-10797567	down	trna91		tRNA
chr13.trna93	67852774	up	35203257	up	12438278	up	trna93		tRNA
chr13.trna95	5124524	up	33306386	up	-1411073	down	trna95		tRNA
chr13.trna97	72229786	up	31702766	up	-11757852	down	trna97		tRNA
chr13.trna980	36570125	up	35901158	up	1579919	up	trna980		tRNA
chr13.trna100	3994567	up	36889694	up	15506313	up	trna100		tRNA
chr13.trna977	76149907	up	3476957	up	-10412829	down	trna977		tRNA
chr13.trna974	66149573	up	343196	up	12244124	up	trna974		tRNA
chr13.trna103	4480047	up	2905238	up	14988385	up	trna103		tRNA
chr13.trna969	-19810636	down	-22328196	down	10502603	up	trna969		tRNA
chr13.trna967	23325143	up	15807102	up	17863361	up	trna967		tRNA
chr13.trna966	-1791806	down	-4399253	down	-10840979	down	trna966		tRNA
chr13.trna965	2728963	up	16073726	up	10304831	up	trna965		tRNA
chr13.trna964	15253044	up	25823972	up	11972415	up	trna964		tRNA
chr13.trna105	4332322	up	26969624	up	2334312	up	trna105		tRNA
chr13.trna963	2728963	up	16073726	up	10304831	up	trna963		tRNA
chr13.trna962	-1.0	down	-2080277	down	-14249532	down	trna962		tRNA
chr13.trna110	14650618	up	-12830306	down	24516408	up	trna110		tRNA
chr13.trna111	34915588	up	4692882	up	-10601817	down	trna111		tRNA
chr13.trna112	30807197	up	15050428	up	-15426913	down	trna112		tRNA
chr13.trna113	19350053	up	34023583	up	-13410678	down	trna113		tRNA
chr13.trna114	18500923	up	27227979	up	-15296673	down	trna114		tRNA
ENSMUSG00000065178	27211466	up	24074361	up	10153797	up	U1		snRNA	RFAM:RF00003
MI0000142	14727492	up	14670653	up	-2120194	down	mmu-mir-27b	387221	miRNA	miRBase:MI0000142
ENSMUSG00000088308	11577935	up	-2116089	down	-18610319	down	snoU109		snoRNA	RFAM:RF01233
ENSMUSG00000065836	10149217	up	20822453	up	18350704	up	U12		snRNA	RFAM:RF00007
ENSMUSG00000077797	12041004	up	2888147	up	-12604234	down	Snord19		snoRNA	RFAM:RF00569
ENSMUSG00000065853	28951526	up	25871546	up	-16698359	down	SNORD58		snoRNA	RFAM:RF00151
ENSMUSG00000093044	3378851	up	50042596	up	-11841772	down	Snord8		snoRNA	RFAM:RF00377
chr14.trna210	26969602	up	1668713	up	10242746	up	trna210		tRNA
chr14.trna352	4348818	up	26634867	up	2351519	up	trna352		tRNA
chr14.trna364	4864884	up	34494328	up	20120692	up	trna364		tRNA
ENSMUSG00000077737	22385614	up	19456991	up	-16699405	down	Snord72		snoRNA	RFAM:RF00577
ENSMUSG00000089317	-10251081	down	-21548805	down	-1270122	down	Snord123		snoRNA	RFAM:RF01156
chr15.trna913	22312748	up	14935207	up	12109054	up	trna913		tRNA
MI0000145	-15648273	down	-20300388	down	-12310479	down	mmu-mir-30b	387226	miRNA	miRBase:MI0000145
chr15.trna876	19509614	up	2622219	up	-10601817	down	trna876		tRNA
ENSMUSG00000077734	-1417408	down	3065929	up	-11935271	down	Snord83b		snoRNA	RFAM:RF00593
ENSMUSG00000065176	21044848	up	23596697	up	-13135082	down	U12		snRNA	RFAM:RF00007
chr16.trna50	20905054	up	2603394	up	14056458	up	trna50		tRNA
ENSMUSG00000088524	25914388	up	274778	up	11962517	up	Snord2		snoRNA	RFAM:RF01299
ENSMUSG00000084581	-13233299	down	-20109107	down	-10052993	down	U4		snRNA	RFAM:RF00015
chr17.trna81	24908392	up	15835466	up	10984818	up	trna81		tRNA
chr17.trna999	2537743	up	2587421	up	12561368	up	trna999		tRNA
chr17.trna83	35363462	up	20471928	up	-10745378	down	trna83		tRNA
chr17.trna994	10911664	up	-10601671	down	25919604	up	trna994		tRNA
ENSMUSG00000064768	3577849	up	33526025	up	-11690559	down	SNORD60		snoRNA	RFAM:RF00271
ENSMUSG00000089255	-2289516	down	-11443955	down	-10743837	down	Snora78		snoRNA	RFAM:RF01225
ENSMUSG00000077709	20843713	up	38623717	up	-11206278	down	Snora64		snoRNA	RFAM:RF00264
chr17.trna112	22285671	up	-10053483	down	2278171	up	trna112		tRNA
ENSMUSG00000092678	17973677	up	28976996	up	-12610407	down	snR78		snoRNA	RFAM:RF01176
ENSMUSG00000064853	1547977	up	16194518	up	-21138017	down	SNORA38		snoRNA	RFAM:RF00428
ENSMUSG00000065273	13240778	up	10947258	up	-21860664	down	SNORD83		snoRNA	RFAM:RF00137
ENSMUSG00000092713	13245512	up	321249	up	-10002329	down	SNORD53_SNORD92		snoRNA	RFAM:RF00325
ENSMUSG00000064871	2019602	up	25779018	up	11408869	up	Snord58b		snoRNA	RFAM:RF00151
ENSMUSG00000064400	10444509	up	-2074085	down	-10382037	down	U3		snoRNA	RFAM:RF00012
chr19.trna713	10732477	up	3096337	up	12697657	up	trna713		tRNA
ENSMUSG00000064721	41858864	up	17794701	up	11358083	up	snR56		snoRNA	RFAM:RF01188
ENSMUSG00000065392	28327599	up	21605148	up	12591475	up	SNORD26		snoRNA	RFAM:RF00087
ENSMUSG00000065280	15689335	up	2808859	up	1044182	up	SNORD28		snoRNA	RFAM:RF00085
ENSMUSG00000065378	2315023	up	-16107013	down	-18603154	down	SNORD29		snoRNA	RFAM:RF00070
ENSMUSG00000065087	25198858	up	1799237	up	-12040366	down	Snord22		snoRNA	RFAM:RF00099
ENSMUSG00000070167	24490345	up	48802156	up	-10502764	down	SNORA57		snoRNA	RFAM:RF00191
chr19.trna107	2942724	up	25857165	up	2066605	up	trna107		tRNA
chr19.trna641	14943584	up	31364727	up	15226878	up	trna641		tRNA
chr19.trna639	25854647	up	14950495	up	1082738	up	trna639		tRNA
chr19.trna109	15085379	up	10900211	up	23668654	up	trna109		tRNA
ENSMUSG00000065642	2562477	up	26230097	up	-21324754	down	Snora69		snoRNA	RFAM:RF00265
ENSMUSG00000065110	2472185	up	14057485	up	-1426516	down	Snord61		snoRNA	RFAM:RF01170
chrX.trna321	14366112	up	13539431	up	2226536	up	trna321		tRNA
