# Supplementary material for: Altered RNome expression in Murine Gastrocnemius Muscle Following Exposure to Jararhagin, a Metalloproteinase from Bothrops Jararaca Venom
Source: Preprints.org preprint supplement (doi:10.20944/preprints202206.0057.v1), 2022-06-06
Supplement: Supplementary file 3 [file Table S2.xlsx]

## Sheet: Table S2
Table S2. Novel small RNAs identified in this study
Gene ID	FC ([Jar 24hrs] vs [Jar 2hrs])	Regulation ([Jar 24hrs] vs [Jar 2hrs])	FC ([Jar 24hrs] vs [PBS 24hrs])	Regulation ([Jar 24hrs] vs [PBS 24hrs])	FC ([Jar 2hrs] vs [PBS 2hrs])	Regulation ([Jar 2hrs] vs [PBS 2hrs])	Gene Type
NEWGENE25	-10159934	down	13443757	up	-16621159	down	Unknown
NEWGENE1303	-10965624	down	-56918216	down	12334081	up	snoRNA
NEWGENE45	6658013	up	10134342	up	16057926	up	Unknown
NEWGENE1633	-15628854	down	-35486875	down	13872688	up	snoRNA
NEWGENE133	20352838	up	12643021	up	14191558	up	Unknown
NEWGENE1692	-14417175	down	-5397202	down	2028052	up	snoRNA
NEWGENE1740	-12653141	down	-8914615	down	14093354	up	snoRNA
NEWGENE268	15863319	up	12440503	up	-13287675	down	Unknown
NEWGENE2334	-17715078	down	-42830033	down	19411795	up	snoRNA
NEWGENE819	-11047461	down	-1623964	down	14544635	up	Unknown
NEWGENE2459	-11467794	down	-14372267	down	17918872	up	snoRNA
NEWGENE2640	-14500119	down	-17991382	down	12546952	up	snoRNA
NEWGENE2692	-11773223	down	-4124275	down	19711077	up	snoRNA
NEWGENE1009	-11484119	down	-36073563	down	16578625	up	Unknown
NEWGENE1062	-12812873	down	-2824723	down	14404854	up	Unknown
NEWGENE1132	-11604822	down	-31467237	down	38751967	up	Unknown
NEWGENE1188	-14091743	down	-2448248	down	11838799	up	Unknown
