# Supplementary material for: Altered RNome expression in Murine Gastrocnemius Muscle Following Exposure to Jararhagin, a Metalloproteinase from Bothrops Jararaca Venom
Source: Preprints.org preprint supplement (doi:10.20944/preprints202206.0057.v1), 2022-06-06
Supplement: Supplementary file 4 [file Table S3.xlsx]

## Sheet: Table S3
Table S3. Mature miRNAs differentially expressed in all groups
Gene ID	FC ([Jar 24hrs] vs [Jar 2hrs])	Regulation ([Jar 24hrs] vs [Jar 2hrs])	FC ([Jar 24hrs] vs [PBS 24hrs])	Regulation ([Jar 24hrs] vs [PBS 24hrs])	FC ([Jar 2hrs] vs [PBS 2hrs])	Regulation ([Jar 2hrs] vs [PBS 2hrs])	Accession	Entrez ID	Gene Type	DB Refs
MI0003493_1	-1.0	down	10033004	up	22788212	up	mmu-miR-486-5p	723876	miRNA	miRBase:MI0003493
MI0014103_2	-1.0	down	-10033004	down	2267586	up	mmu-miR-3107-5p	100526510	miRNA	miRBase:MI0014103
MI0000570_2	10189147	up	-24393368	down	-13056506	down	mmu-miR-22-3p	387141	miRNA	miRBase:MI0000570
MI0000154_2	-21857536	down	-20063715	down	14942282	up	mmu-miR-127-3p	387146	miRNA	miRBase:MI0000154
MI0000562_2	-24403317	down	-13865875	down	22067332	up	mmu-let-7f-5p	387252	miRNA	miRBase:MI0000562
MI0000257_1	12735606	up	26792784	up	12032893	up	mmu-miR-143-3p	387161	miRNA	miRBase:MI0000257
MI0000563_1	-24403317	down	-13865875	down	22067332	up	mmu-let-7f-5p	387253	miRNA	miRBase:MI0000563
