# Supplementary material for: Altered RNome expression in Murine Gastrocnemius Muscle Following Exposure to Jararhagin, a Metalloproteinase from Bothrops Jararaca Venom
Source: Preprints.org preprint supplement (doi:10.20944/preprints202206.0057.v1), 2022-06-06
Supplement: Supplementary file 5 [file Table S4.xlsx]

## Sheet: Table S5
Table S5. Target genes identified in the MirWalk for the four differentially expressed mature mmu-miRNAs
Entrezid	Genesymbol	Description
329540	Nol4l	Mus musculus nucleolar protein 4-like (Nol4l), transcript variant1, mRNA.
230908	Tardbp	Mus musculus TAR DNA binding protein (Tardbp), transcript variant6, mRNA.
19059	Ppp3r2	Mus musculus protein phosphatase 3, regulatory subunit B, alphaisoform (calcineurin B, type II) (Ppp3r2), mRNA.
208606	Rsrc2	Mus musculus arginine/serine-rich coiled-coil 2 (Rsrc2), transcriptvariant 1, mRNA.
399548	Scn4b	Mus musculus sodium channel, type IV, beta (Scn4b), mRNA.
432582	Ccdc92b	Mus musculus coiled-coil domain containing 92B (Ccdc92b), mRNA.
216850	Kdm6b	Mus musculus KDM1 lysine (K)-specific demethylase 6B (Kdm6b), mRNA.
235130	Adamts15	Mus musculus a disintegrin-like and metallopeptidase (reprolysintype) with thrombospondin type 1 motif, 15 (Adamts15), transcript
269473	Lrig2	Mus musculus leucine-rich repeats and immunoglobulin-like domains 2(Lrig2), transcript variant 1, mRNA.
18212	Ntrk2	Mus musculus neurotrophic tyrosine kinase, receptor, type 2(Ntrk2), transcript variant 1, mRNA.
20908	Stx3	Mus musculus syntaxin 3 (Stx3), transcript variant B, mRNA.
215789	Phactr2	Mus musculus phosphatase and actin regulator 2 (Phactr2),transcript variant D, mRNA.
223827	Gxylt1	Mus musculus glucoside xylosyltransferase 1 (Gxylt1), transcriptvariant 1, mRNA.
331401	Thoc2	Mus musculus THO complex 2 (Thoc2), mRNA.
380916	Lrch1	Mus musculus leucine-rich repeats and calponin homology (CH) domaincontaining 1 (Lrch1), transcript variant 1, mRNA.
12912	Creb1	Mus musculus cAMP responsive element binding protein 1 (Creb1),transcript variant C, mRNA.
320609	Strip2	Mus musculus striatin interacting protein 2 (Strip2), transcriptvariant 2, mRNA.
73469	Rnf38	Mus musculus ring finger protein 38 (Rnf38), transcript variant 2,mRNA.
18162	Npr3	Mus musculus natriuretic peptide receptor 3 (Npr3), transcriptvariant 2, mRNA.
636931	Trim71	Mus musculus tripartite motif-containing 71 (Trim71), mRNA.
17126	Smad2	Mus musculus SMAD family member 2 (Smad2), transcript variant 2,mRNA.
17187	Max	Mus musculus Max protein (Max), transcript variant 2, mRNA.
17714	Grpel2	Mus musculus GrpE-like 2, mitochondrial (Grpel2), mRNA; nucleargene for mitochondrial product.
18162	Npr3	Mus musculus natriuretic peptide receptor 3 (Npr3), transcriptvariant 2, mRNA.
18212	Ntrk2	Mus musculus neurotrophic tyrosine kinase, receptor, type 2(Ntrk2), transcript variant 1, mRNA.
18231	Nxph1	Mus musculus neurexophilin 1 (Nxph1), mRNA.
18514	Pbx1	Mus musculus pre B cell leukemia homeobox 1 (Pbx1), transcriptvariant c, mRNA.
18986	Pou2f1	Mus musculus POU domain, class 2, transcription factor 1 (Pou2f1),transcript variant 5, mRNA.
19013	Ppara	Mus musculus peroxisome proliferator activated receptor alpha(Ppara), transcript variant 2, mRNA.
19059	Ppp3r2	Mus musculus protein phosphatase 3, regulatory subunit B, alphaisoform (calcineurin B, type II) (Ppp3r2), mRNA.
19070	Mob4	Mus musculus MOB family member 4, phocein (Mob4), transcriptvariant 2, mRNA.
19087	Prkar2a	Mus musculus protein kinase, cAMP dependent regulatory, type IIalpha (Prkar2a), mRNA.
19224	Ptgs1	Mus musculus prostaglandin-endoperoxide synthase 1 (Ptgs1), mRNA.
19344	Rab5b	Mus musculus RAB5B, member RAS oncogene family (Rab5b), mRNA.
19419	Rasgrp1	Mus musculus RAS guanyl releasing protein 1 (Rasgrp1), mRNA.
19684	Rdx	Mus musculus radixin (Rdx), transcript variant 2, mRNA.
20452	St8sia4	Mus musculus ST8 alpha-N-acetyl-neuraminidealpha-2,8-sialyltransferase 4 (St8sia4), transcript variant 2,
20498	Slc12a4	Mus musculus solute carrier family 12, member 4 (Slc12a4),transcript variant 1, mRNA.
20515	Slc20a1	Mus musculus solute carrier family 20, member 1 (Slc20a1),transcript variant 2, mRNA.
20540	Slc7a7	Mus musculus solute carrier family 7 (cationic amino acidtransporter, y+ system), member 7 (Slc7a7), transcript variant 2,
20668	Sox13	Mus musculus SRY (sex determining region Y)-box 13 (Sox13), mRNA.
20843	Stag2	Mus musculus stromal antigen 2 (Stag2), transcript variant 2, mRNA.
20908	Stx3	Mus musculus syntaxin 3 (Stx3), transcript variant B, mRNA.
21949	Tnfsf8	Mus musculus tumor necrosis factor (ligand) superfamily, member 8(Tnfsf8), mRNA.
22234	Ugcg	Mus musculus UDP-glucose ceramide glucosyltransferase (Ugcg), mRNA.
22344	Vezf1	Mus musculus vascular endothelial zinc finger 1 (Vezf1), mRNA.
22779	Ikzf2	Mus musculus IKAROS family zinc finger 2 (Ikzf2), mRNA.
23794	Adamts5	Mus musculus a disintegrin-like and metallopeptidase (reprolysintype) with thrombospondin type 1 motif, 5 (aggrecanase-2)
23939	Mapk7	Mus musculus mitogen-activated protein kinase 7 (Mapk7), transcriptvariant 3, mRNA.
26401	Map3k1	Mus musculus mitogen-activated protein kinase kinase kinase 1(Map3k1), mRNA.
26456	Sema4g	Mus musculus sema domain, immunoglobulin domain (Ig), transmembranedomain (TM) and short cytoplasmic domain, (semaphorin) 4G (Sema4g),
26877	B3galt1	Mus musculus UDP-Gal:betaGlcNAc beta 1,3-galactosyltransferase,polypeptide 1 (B3galt1), transcript variant 1, mRNA.
27355	Pald1	Mus musculus phosphatase domain containing, paladin 1 (Pald1),transcript variant 2, mRNA.
29808	Mga	Mus musculus MAX gene associated (Mga), transcript variant 2, mRNA.
29876	Clic4	Mus musculus chloride intracellular channel 4 (mitochondrial)(Clic4), mRNA.
30948	Bin1	Mus musculus bridging integrator 1 (Bin1), transcript variant 2,mRNA.
50505	Ercc4	Mus musculus excision repair cross-complementing rodent repairdeficiency, complementation group 4 (Ercc4), mRNA.
50528	Tmprss2	Mus musculus transmembrane protease, serine 2 (Tmprss2), mRNA.
53417	Hif3a	Mus musculus hypoxia inducible factor 3, alpha subunit (Hif3a),transcript variant 1, mRNA.
54004	Diaph2	Mus musculus diaphanous related formin 2 (Diaph2), mRNA.
54151	Cyhr1	Mus musculus cysteine and histidine rich 1 (Cyhr1), transcriptvariant 3, mRNA.
54650	Sfmbt1	Mus musculus Scm-like with four mbt domains 1 (Sfmbt1), transcriptvariant 2, mRNA.
56291	Styx	Mus musculus serine/threonine/tyrosine interaction protein (Styx),mRNA.
56349	Net1	Mus musculus neuroepithelial cell transforming gene 1 (Net1),transcript variant 2, mRNA.
56501	Elf4	Mus musculus E74-like factor 4 (ets domain transcription factor)(Elf4), transcript variant 1, mRNA.
56503	Ankrd49	Mus musculus ankyrin repeat domain 49 (Ankrd49), transcript variant2, mRNA.
56520	Nme4	Mus musculus NME/NM23 nucleoside diphosphate kinase 4 (Nme4), mRNA;nuclear gene for mitochondrial product.
64707	Suv39h2	Mus musculus suppressor of variegation 3-9 2 (Suv39h2), transcriptvariant 1, mRNA.
66240	Kcne1l	Mus musculus potassium voltage-gated channel, Isk-related family,member 1-like, pseudogene (Kcne1l), mRNA.
66701	Spryd4	Mus musculus SPRY domain containing 4 (Spryd4), mRNA.
67760	Slc38a2	Mus musculus solute carrier family 38, member 2 (Slc38a2),transcript variant 2, mRNA.
67769	Gpatch2	Mus musculus G patch domain containing 2 (Gpatch2), transcriptvariant 2, mRNA.
67771	Arpc5	Mus musculus actin related protein 2/3 complex, subunit 5 (Arpc5),mRNA.
67878	Tmem33	Mus musculus transmembrane protein 33 (Tmem33), transcript variant3, mRNA.
68031	Rnf146	Mus musculus ring finger protein 146 (Rnf146), transcript variant3, mRNA.
68744	Zfp740	Mus musculus zinc finger protein 740 (Zfp740), transcript variant1, mRNA.
68770	Phtf2	Mus musculus putative homeodomain transcription factor 2 (Phtf2),mRNA.
69137	Vstm5	Mus musculus V-set and transmembrane domain containing 5 (Vstm5),mRNA.
69207	Srsf11	Mus musculus serine and arginine-rich splicing factor 11 (Srsf11),transcript variant 2, mRNA.
69632	Arhgef12	Mus musculus Rho guanine nucleotide exchange factor (GEF) 12(Arhgef12), transcript variant 2, mRNA.
70686	Dusp16	Mus musculus dual specificity phosphatase 16 (Dusp16), transcriptvariant B1, mRNA.
70998	Phf6	Mus musculus PHD finger protein 6 (Phf6), transcript variant 2,mRNA.
71207	Nudt4	Mus musculus nudix (nucleoside diphosphate linked moiety X)-typemotif 4 (Nudt4), transcript variant 1, mRNA.
71592	Pogk	Mus musculus pogo transposable element with KRAB domain (Pogk),transcript variant 2, mRNA.
71720	Osbpl3	Mus musculus oxysterol binding protein-like 3 (Osbpl3), transcriptvariant 2, mRNA.
71751	Map3k13	Mus musculus mitogen-activated protein kinase kinase kinase 13(Map3k13), mRNA.
72425	Katnbl1	Mus musculus katanin p80 subunit B like 1 (Katnbl1), mRNA.
73469	Rnf38	Mus musculus ring finger protein 38 (Rnf38), transcript variant 2,mRNA.
74011	Slc25a27	Mus musculus solute carrier family 25, member 27 (Slc25a27),transcript variant 2, mRNA; nuclear gene for mitochondrial product.
74026	Msl1	Mus musculus male specific lethal 1 (Msl1), transcript variant 2,mRNA.
74137	Nuak2	Mus musculus NUAK family, SNF1-like kinase, 2 (Nuak2), transcriptvariant A, mRNA.
74365	Lonrf3	Mus musculus LON peptidase N-terminal domain and ring finger 3(Lonrf3), mRNA.
74411	Plpp6	Mus musculus phospholipid phosphatase 6 (Plpp6), mRNA.
74493	Tnks2	Mus musculus tankyrase, TRF1-interacting ankyrin-related ADP-ribosepolymerase 2 (Tnks2), mRNA.
74868	Tmem65	Mus musculus transmembrane protein 65 (Tmem65), mRNA.
75320	Etnk1	Mus musculus ethanolamine kinase 1 (Etnk1), mRNA.
76399	Il31	Mus musculus interleukin 31 (Il31), mRNA.
76479	Smndc1	Mus musculus survival motor neuron domain containing 1 (Smndc1),transcript variant 2, mRNA.
76559	Atg2b	Mus musculus autophagy related 2B (Atg2b), mRNA.
76742	Snx27	Mus musculus sorting nexin family member 27 (Snx27), transcriptvariant 1, mRNA.
76850	38200	Mus musculus argonaute RISC catalytic subunit 4 (Ago4), mRNA.
77305	Wdr82	Mus musculus WD repeat domain containing 82 (Wdr82), mRNA.
77853	Msl2	Mus musculus MSL complex subunit 2 (Msl2), transcript variant 1,mRNA.
78339	Ttyh3	Mus musculus tweety family member 3 (Ttyh3), transcript variant 3,mRNA.
78787	Usp54	Mus musculus ubiquitin specific peptidase 54 (Usp54), mRNA.
78913	Ltn1	Mus musculus listerin E3 ubiquitin protein ligase 1 (Ltn1), mRNA.
80288	Bcl9l	Mus musculus B cell CLL/lymphoma 9-like (Bcl9l), transcript variant2, mRNA.
80385	Tusc2	Mus musculus tumor suppressor 2, mitochondrial calcium regulator(Tusc2), mRNA.
80883	Ntng1	Mus musculus netrin G1 (Ntng1), transcript variant b, mRNA.
83925	Trps1	Mus musculus transcriptional repressor GATA binding 1 (Trps1),transcript variant 1, mRNA.
93960	Nkd1	Mus musculus naked cuticle 1 (Nkd1), transcript variant 2, mRNA.
94214	Spock2	Mus musculus sparc/osteonectin, cwcv and kazal-like domainsproteoglycan 2 (Spock2), mRNA.
98386	Lbr	Mus musculus lamin B receptor (Lbr), mRNA.
101095	Zfp282	Mus musculus zinc finger protein 282 (Zfp282), mRNA.
105239	Rnf44	Mus musculus ring finger protein 44 (Rnf44), transcript variant 1,mRNA.
107271	Yars	Mus musculus tyrosyl-tRNA synthetase (Yars), transcript variant 1,mRNA.
108954	Ppp1r15b	Mus musculus protein phosphatase 1, regulatory subunit 15B(Ppp1r15b), mRNA.
109079	Sephs1	Mus musculus selenophosphate synthetase 1 (Sephs1), transcriptvariant 1, mRNA.
109904	Mcf2	Mus musculus mcf.2 transforming sequence (Mcf2), transcript variant3, mRNA.
142682	Zcchc14	Mus musculus zinc finger, CCHC domain containing 14 (Zcchc14),mRNA.
170439	Elovl6	Mus musculus ELOVL family member 6, elongation of long chain fattyacids (yeast) (Elovl6), mRNA.
170826	Ppargc1b	Mus musculus peroxisome proliferative activated receptor, gamma,coactivator 1 beta (Ppargc1b), transcript variant 2, mRNA.
192654	Pla2g15	Mus musculus phospholipase A2, group XV (Pla2g15), transcriptvariant 2, mRNA.
208606	Rsrc2	Mus musculus arginine/serine-rich coiled-coil 2 (Rsrc2), transcriptvariant 1, mRNA.
209131	Snx30	Mus musculus sorting nexin family member 30 (Snx30), mRNA.
212555	Slc66a1	Mus musculus solute carrier family 66 member 1 (Slc66a1),transcript variant 1, mRNA.
214112	Nipal4	Mus musculus NIPA-like domain containing 4 (Nipal4), mRNA.
214469	Fam168b	Mus musculus family with sequence similarity 168, member B(Fam168b), transcript variant 1, mRNA.
215789	Phactr2	Mus musculus phosphatase and actin regulator 2 (Phactr2),transcript variant D, mRNA.
216742	Fnip1	Mus musculus folliculin interacting protein 1 (Fnip1), mRNA.
216850	Kdm6b	Mus musculus KDM1 lysine (K)-specific demethylase 6B (Kdm6b), mRNA.
217082	Hlf	Mus musculus hepatic leukemia factor (Hlf), mRNA.
223827	Gxylt1	Mus musculus glucoside xylosyltransferase 1 (Gxylt1), transcriptvariant 1, mRNA.
225631	Onecut2	Mus musculus one cut domain, family member 2 (Onecut2), mRNA.
226151	Slf2	Mus musculus SMC5-SMC6 complex localization factor 2 (Slf2),transcript variant 1, mRNA.
226856	Lpgat1	Mus musculus lysophosphatidylglycerol acyltransferase 1 (Lpgat1),transcript variant 1, mRNA.
227195	Ino80d	Mus musculus INO80 complex subunit D (Ino80d), transcript variant2, mRNA.
229675	Rsbn1	Mus musculus rosbin, round spermatid basic protein 1 (Rsbn1),transcript variant 2, mRNA.
230233	Elp1	Mus musculus elongator complex protein 1 (Elp1), mRNA.
230257	Ptbp3	Mus musculus polypyrimidine tract binding protein 3 (Ptbp3),transcript variant 1, mRNA.
230596	Prpf38a	Mus musculus PRP38 pre-mRNA processing factor 38 (yeast) domaincontaining A (Prpf38a), mRNA.
230908	Tardbp	Mus musculus TAR DNA binding protein (Tardbp), transcript variant6, mRNA.
231207	Cpeb2	Mus musculus cytoplasmic polyadenylation element binding protein 2(Cpeb2), transcript variant 2, mRNA.
231991	Creb5	Mus musculus cAMP responsive element binding protein 5 (Creb5),transcript variant 1, mRNA.
232087	Mat2a	Mus musculus methionine adenosyltransferase II, alpha (Mat2a),transcript variant 2, mRNA.
234353	Psd3	Mus musculus pleckstrin and Sec7 domain containing 3 (Psd3),transcript variant 3, mRNA.
234733	Ddx19b	Mus musculus DEAD box helicase 19b (Ddx19b), transcript variant 1,mRNA.
235072	Septin7	Mus musculus septin 7 (Septin7), transcript variant 2, mRNA.
235130	Adamts15	Mus musculus a disintegrin-like and metallopeptidase (reprolysintype) with thrombospondin type 1 motif, 15 (Adamts15), transcript
235132	Zbtb44	Mus musculus zinc finger and BTB domain containing 44 (Zbtb44),transcript variant a, mRNA.
239170	Fam160b2	Mus musculus family with sequence similarity 160, member B2(Fam160b2), mRNA.
239759	Liph	Mus musculus lipase, member H (Liph), transcript variant 1, mRNA.
239845	Gpr156	Mus musculus G protein-coupled receptor 156 (Gpr156), mRNA.
241919	Slc7a14	Mus musculus solute carrier family 7 (cationic amino acidtransporter, y+ system), member 14 (Slc7a14), mRNA.
242316	Gdf6	Mus musculus growth differentiation factor 6 (Gdf6), mRNA.
242406	Rgp1	Mus musculus RAB6A GEF compex partner 1 (Rgp1), mRNA.
244349	Kat6a	Mus musculus K(lysine) acetyltransferase 6A (Kat6a), transcriptvariant 1, mRNA.
268470	Ube2z	Mus musculus ubiquitin-conjugating enzyme E2Z (Ube2z), mRNA.
269037	Ctif	Mus musculus CBP80/20-dependent translation initiation factor(Ctif), mRNA.
269473	Lrig2	Mus musculus leucine-rich repeats and immunoglobulin-like domains 2(Lrig2), transcript variant 1, mRNA.
270162	Elmod1	Mus musculus ELMO/CED-12 domain containing 1 (Elmod1), mRNA.
279653	Pcdh19	Mus musculus protocadherin 19 (Pcdh19), transcript variant 1, mRNA.
319448	Fndc3a	Mus musculus fibronectin type III domain containing 3A (Fndc3a),mRNA.
319651	Usp37	Mus musculus ubiquitin specific peptidase 37 (Usp37), transcriptvariant 2, mRNA.
320472	Ppm1e	Mus musculus protein phosphatase 1E (PP2C domain containing)(Ppm1e), mRNA.
320609	Strip2	Mus musculus striatin interacting protein 2 (Strip2), transcriptvariant 2, mRNA.
329540	Nol4l	Mus musculus nucleolar protein 4-like (Nol4l), transcript variant1, mRNA.
331401	Thoc2	Mus musculus THO complex 2 (Thoc2), mRNA.
373864	Col27a1	Mus musculus collagen, type XXVII, alpha 1 (Col27a1), mRNA.
380916	Lrch1	Mus musculus leucine-rich repeats and calponin homology (CH) domaincontaining 1 (Lrch1), transcript variant 1, mRNA.
381290	Atp2b4	Mus musculus ATPase, Ca++ transporting, plasma membrane 4 (Atp2b4),transcript variant a, mRNA.
381319	Batf3	Mus musculus basic leucine zipper transcription factor, ATF-like 3(Batf3), mRNA.
399548	Scn4b	Mus musculus sodium channel, type IV, beta (Scn4b), mRNA.
432582	Ccdc92b	Mus musculus coiled-coil domain containing 92B (Ccdc92b), mRNA.
636931	Trim71	Mus musculus tripartite motif-containing 71 (Trim71), mRNA.
