# Supplementary material for: Altered RNome expression in Murine Gastrocnemius Muscle Following Exposure to Jararhagin, a Metalloproteinase from Bothrops Jararaca Venom
Source: Preprints.org preprint supplement (doi:10.20944/preprints202206.0057.v1), 2022-06-06
Supplement: Supplementary file 6 [file Table S5.xlsx]

## Sheet: Table S5
Table S4. Table S10. Enriched pathways and GO terms in gastrocnemius muscle samples with jararhagin. The results were obtained from the target genes identified in the miRWalk for the four differentially expressed mmu-miRNAs.
KEGG pathways
Name	Hits	Pop Hits	List Total	Pop Total	Genes	Pvalue	adjusted Pvalue(BH)
mmu04010_MAPK_signaling_pathway	11	294	79	8743	Ppp3r2;Ntrk2;Dusp16;Max;Mapk7;Insr;Cacna1e;Rasgrp1;Map3k1;Kras;Map3k13	0.0002	0.0038
mmu04924_Renin_secretion	5	76	79	8743	Ppp3r2;Creb1;Adrb1;Edn1;Adrb3	0.001	0.0095
mmu04022_cGMP-PKG_signaling_pathway	7	173	79	8743	Ppp3r2;Creb1;Atp2b4;Creb5;Insr;Adrb1;Adrb3	0.0016	0.0101
mmu04024_cAMP_signaling_pathway	7	215	79	8743	Creb1;Ppara;Atp2b4;Creb5;Htr4;Adrb1;Edn1	0.0051	0.0194
mmu04931_Insulin_resistance	5	110	79	8743	Creb1;Ppara;Creb5;Insr;Ppargc1b	0.0045	0.0194
mmu04926_Relaxin_signaling_pathway	5	129	79	8743	Creb1;Smad2;Creb5;Edn1;Kras	0.0084	0.0266
mmu04020_Calcium_signaling_pathway	6	192	79	8743	Ppp3r2;Atp2b4;Htr4;Adrb1;Cacna1e;Adrb3	0.0108	0.0293
mmu04261_Adrenergic_signaling_in_cardiomyocytes	5	152	79	8743	Scn4b;Creb1;Atp2b4;Creb5;Adrb1	0.0156	0.037
GO_Biological Processes (BP)
Name	Hits	Pop Hits	List Total	Pop Total	Genes	Pvalue	adjusted Pvalue(BH)
GO:0099003_vesicle-mediated_transport_in_synapse	5	32	153	16668	Stx3	0.0	0.0
GO:0120162_positive_regulation_of_cold-induced_thermogenesis	7	99	153	16668	Kdm6b;Ppargc1b;Adrb1;Adrb3;Elovl6	0.0001	0.0008
GO:0008217_regulation_of_blood_pressure	5	68	153	16668	Npr3;Ptgs1;Edn1	0.0006	0.0039
GO:0035023_regulation_of_Rho_protein_signal_transduction	5	83	153	16668	Net1;Arhgef2;Arhgef12;Fgd6	0.0014	0.008
GO:0007179_transforming_growth_factor_beta_receptor_signaling_pathway	6	132	153	16668	Creb1;Smad2;Map3k1	0.0019	0.0097
GO:0043087_regulation_of_GTPase_activity	5	93	153	16668	Ntrk2;Rdx;Rab3gap2;Fgd6	0.0023	0.0106
GO:0030509_BMP_signaling_pathway	6	146	153	16668	Smad2;Gdf6	0.0031	0.0123
GO:0060395_SMAD_protein_signal_transduction	5	101	153	16668	Smad2;Gdf6	0.0032	0.0123
GO:0006631_fatty_acid_metabolic_process	7	200	153	16668	Ppara;Pla2g15;Ptgs1;Elovl6	0.0035	0.0124
GO:0007015_actin_filament_organization	6	162	153	16668	Abl2;Arhgef2;Ppargc1b;Diaph2	0.005	0.0164
GO:0010629_negative_regulation_of_gene_expression	10	410	153	16668	Tardbp;Creb1;Max;Atp2b4;Smad2;Insr;Pou2f1;Acvr1b;Edn1	0.0067	0.0205
GO:0030036_actin_cytoskeleton_organization	6	209	153	16668	Phactr2;Abl2;Nuak2;Kras;Diaph2	0.0156	0.0414
GO:0030198_extracellular_matrix_organization	6	206	153	16668	Adamts15;Apbb2;Adamts5;Col27a1;Spock2	0.0147	0.0414
GO:0048511_rhythmic_process	5	153	153	16668	Tardbp;Creb1;Ppara;Suv39h2;Hlf	0.0162	0.0414
GO:0043410_positive_regulation_of_MAPK_cascade	5	156	153	16668	Ntrk2;Insr;Adrb3	0.0174	0.0421
GO:0045892_negative_regulation_of_transcription,_DNA-templated	13	716	153	16668	Cbx5;Kat6a;Sfmbt1;Smad2;Trps1;Ppargc1b;Pou2f1;Sox13;Suv39h2	0.0212	0.0488
GO_Cellular Component (CC)
Name	Hits	Pop Hits	List Total	Pop Total	Genes	Pvalue	adjusted Pvalue(BH)
GO:0002025_norepinephrine-epinephrine-mediated_vasodilation_involved_in_regulation_of_systemic_arterial_blood_pressure	5	8	153	16668	Adrb1;Adrb3	0.0	0.0
GO:0032924_activin_receptor_signaling_pathway	5	20	153	16668	Smad2;Acvr1b;Gdf6	0.0	0.0
GO:0043984_histone_H4-K16_acetylation	5	21	153	16668	Msl2;Msl1	0.0	0.0
GO:0098967_exocytic_insertion_of_neurotransmitter_receptor_to_postsynaptic_membrane	6	17	153	16668	Stx3	0.0	0.0
GO:0099003_vesicle-mediated_transport_in_synapse	5	32	153	16668	Stx3	0.0	0.0
GO:0120162_positive_regulation_of_cold-induced_thermogenesis	7	99	153	16668	Kdm6b;Ppargc1b;Adrb1;Adrb3;Elovl6	0.0001	0.0008
GO:0008217_regulation_of_blood_pressure	5	68	153	16668	Npr3;Ptgs1;Edn1	0.0006	0.0039
GO:0035023_regulation_of_Rho_protein_signal_transduction	5	83	153	16668	Net1;Arhgef2;Arhgef12;Fgd6	0.0014	0.008
GO:0007179_transforming_growth_factor_beta_receptor_signaling_pathway	6	132	153	16668	Creb1;Smad2;Map3k1	0.0019	0.0097
GO:0043087_regulation_of_GTPase_activity	5	93	153	16668	Ntrk2;Rdx;Rab3gap2;Fgd6	0.0023	0.0106
GO:0030509_BMP_signaling_pathway	6	146	153	16668	Smad2;Gdf6	0.0031	0.0123
GO:0060395_SMAD_protein_signal_transduction	5	101	153	16668	Smad2;Gdf6	0.0032	0.0123
GO:0006631_fatty_acid_metabolic_process	7	200	153	16668	Ppara;Pla2g15;Ptgs1;Elovl6	0.0035	0.0124
GO:0007015_actin_filament_organization	6	162	153	16668	Abl2;Arhgef2;Ppargc1b;Diaph2	0.005	0.0164
GO:0010629_negative_regulation_of_gene_expression	10	410	153	16668	Tardbp;Creb1;Max;Atp2b4;Smad2;Insr;Pou2f1;Acvr1b;Edn1	0.0067	0.0205
GO:0030036_actin_cytoskeleton_organization	6	209	153	16668	Phactr2;Abl2;Nuak2;Kras;Diaph2	0.0156	0.0414
GO:0030198_extracellular_matrix_organization	6	206	153	16668	Adamts15;Apbb2;Adamts5;Col27a1;Spock2	0.0147	0.0414
GO:0048511_rhythmic_process	5	153	153	16668	Tardbp;Creb1;Ppara;Suv39h2;Hlf	0.0162	0.0414
GO:0043410_positive_regulation_of_MAPK_cascade	5	156	153	16668	Ntrk2;Insr;Adrb3	0.0174	0.0421
GO:0045892_negative_regulation_of_transcription,_DNA-templated	13	716	153	16668	Cbx5;Kat6a;Sfmbt1;Smad2;Trps1;Ppargc1b;Pou2f1;Sox13;Suv39h2	0.0212	0.0488
GO_Molecular Functions (MF)
Name	Hits	Pop Hits	List Total	Pop Total	Genes	Pvalue	adjusted Pvalue(BH)
GO:0000785_chromatin	16	378	112	11999	Creb1;Stag2;Slf2;Max;Hif3a;Smad2;Trps1;Hmga2;Gabpa;Mxd1;Suv39h2;Wdr82	0.0	0.0
GO:0030315_T-tubule	7	77	112	11999	Bin1;Rdx;Atp2b4;Kcnj3;Prkar2a	0.0	0.0
GO:0005635_nuclear_envelope	9	221	112	11999	Bin1;Tnks2;Ddx19b;Cyhr1;Tmem33;Insr;Ptgs1;Lbr	0.0004	0.0039
GO:0090575_RNA_polymerase_II_transcription_regulator_complex	5	89	112	11999	Max;Lmo4;Pbx1;Pou2f1	0.0021	0.0122
GO:0098685_Schaffer_collateral_-_CA1_synapse	7	172	112	11999	Stx3;Ntng1;Adrb1	0.0018	0.0122
GO:0098794_postsynapse	6	143	112	11999	Ntrk2;Stx3;Gabra6;Abl2	0.0031	0.015
GO:0016605_PML_body	5	103	112	11999	Cbx5;Kat6a;Max;Mapk7;Elf4	0.0038	0.0157
GO:0043235_receptor_complex	8	266	112	11999	Ntrk2;Gabra6;Insr;Acvr1b;Adrb3	0.0052	0.0188
GO:0000781_chromosome,_telomeric_region	5	130	112	11999	Thoc2;Cbx5;Tnks2;Ercc4;Wdr82	0.0095	0.0306
GO:0098978_glutamatergic_synapse	16	878	112	11999	Ntrk2;Stx3;Bin1;Abl2;Ntng1;Atp2b4;Arhgef2;Septin7;Prkar2a	0.0144	0.0418
